# Supplementary material for: PVD customized 2D porous amorphous silicon nanoflakes percolated with carbon nanotubes for high areal capacity lithium ion batteries
Source: Royal Society of Chemistry journal article supplement (doi:10.1039/c9ta12923e), 2020-01-01
Supplement: c9ta12923e1.pdf [file c9ta12923e1.pdf]

## Supporting information

### **PVD Customized 2D Porous Amorphous Silicon Nanoflakes Percolated with Carbon Nanotubes for High Areal Capacity Lithium Ion Batteries**

Zhouhao Wang<sup>a</sup>, Yan Li<sup>a</sup>, Shaozhuan Huang<sup>a,\*</sup>, Lixiang Liu<sup>b</sup>, Ye Wang<sup>c</sup>, Jun Jin<sup>d</sup>, Dezhi Kong<sup>c</sup>, Lin Zhang<sup>b</sup>, Oliver G. Schmidt<sup>b,e</sup>

*<sup>a</sup>Key Laboratory of Catalysis and Energy Materials Chemistry of Ministry of Education, South-Central University for Nationalities, Wuhan, Hubei, 430074, China, E-mail: husz001@scuec.edu.cn*

*<sup>b</sup>Institute for Integrative Nanosciences, Leibniz Institute for Solid State and Materials Research Dresden, Helmholtzstraße 20, Dresden, 01069 Germany*

*<sup>c</sup>School of Physics and Microelectronics, Zhengzhou University, Zhengzhou, Henan, China*

*<sup>d</sup>Faculty of Materials Science and Chemistry, China University of Geosciences, Wuhan, 430074, China*

*<sup>e</sup>Material Systems for Nanoelectronics, Technische Universität Chemnitz, Germany*

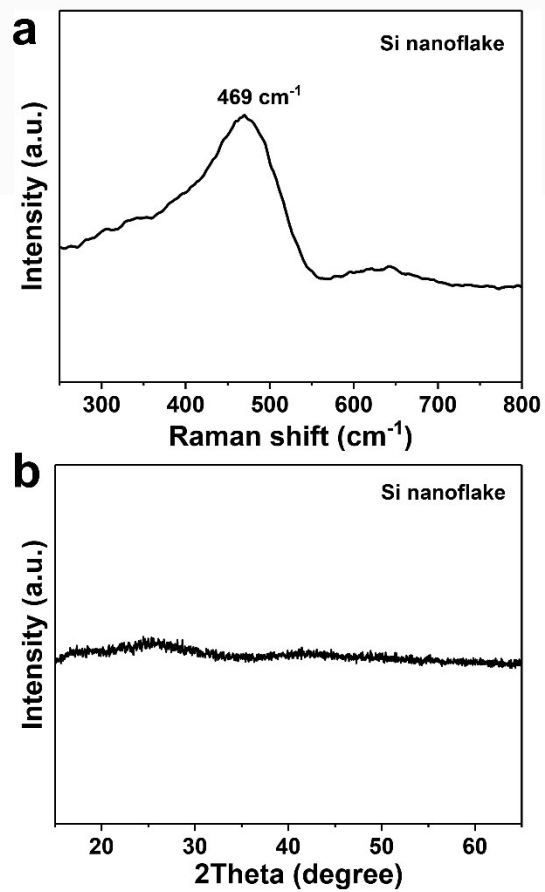

**Figure S1.** (a) Raman spectrum of Si nanoflakes, (b) XRD pattern of Si nanoflakes.

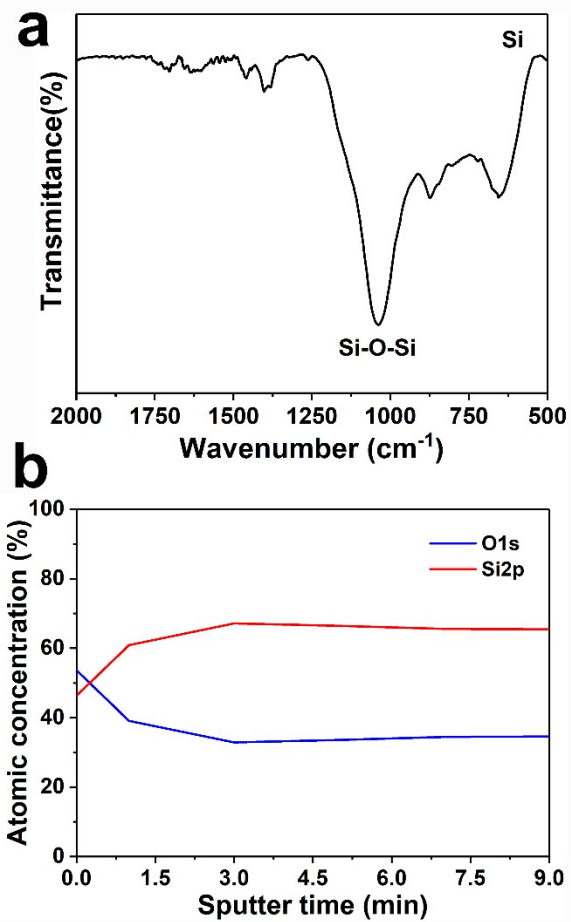

**Figure S2.** (a) FT-IR spectrum of amorphous Si nanoflake, (b) XPS depth profiling of Si 2p and O 1s performed on amorphous Si nanoflake.

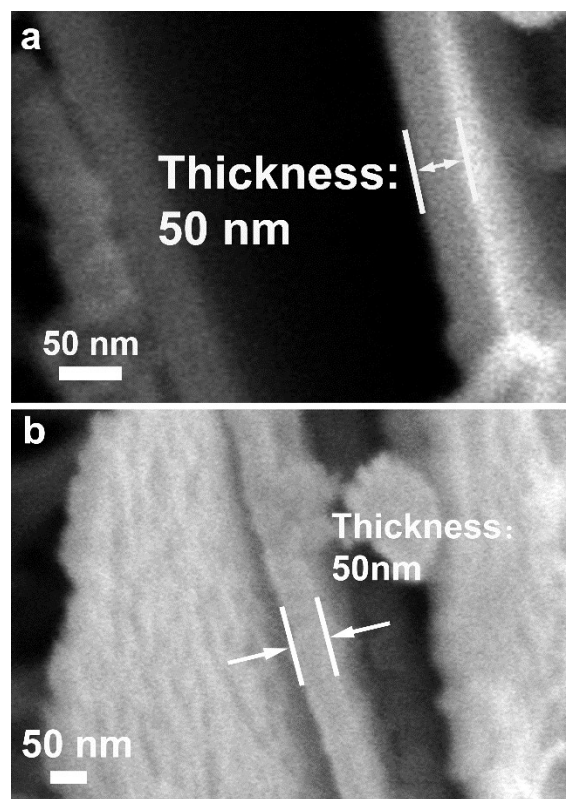

**Figure S3.** Cross sectional SEM image of pristine Si nanoflake (a), and porous Si nanoflake after  $\text{NH}_3 \cdot \text{H}_2\text{O}$  treatment.

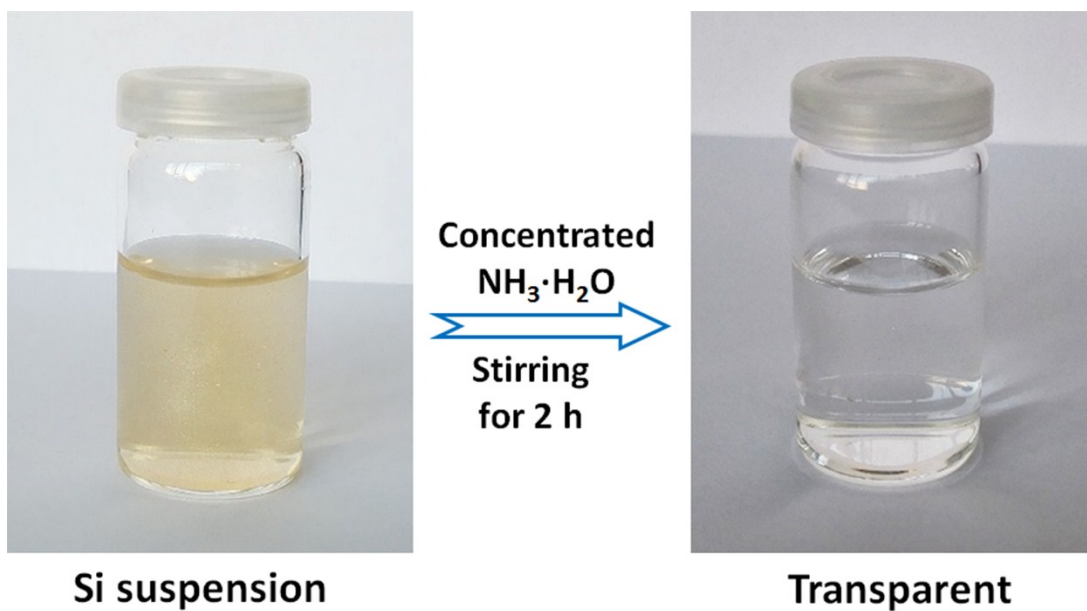

**Figure S4.** Digital picture of the Si suspension before/after reaction.

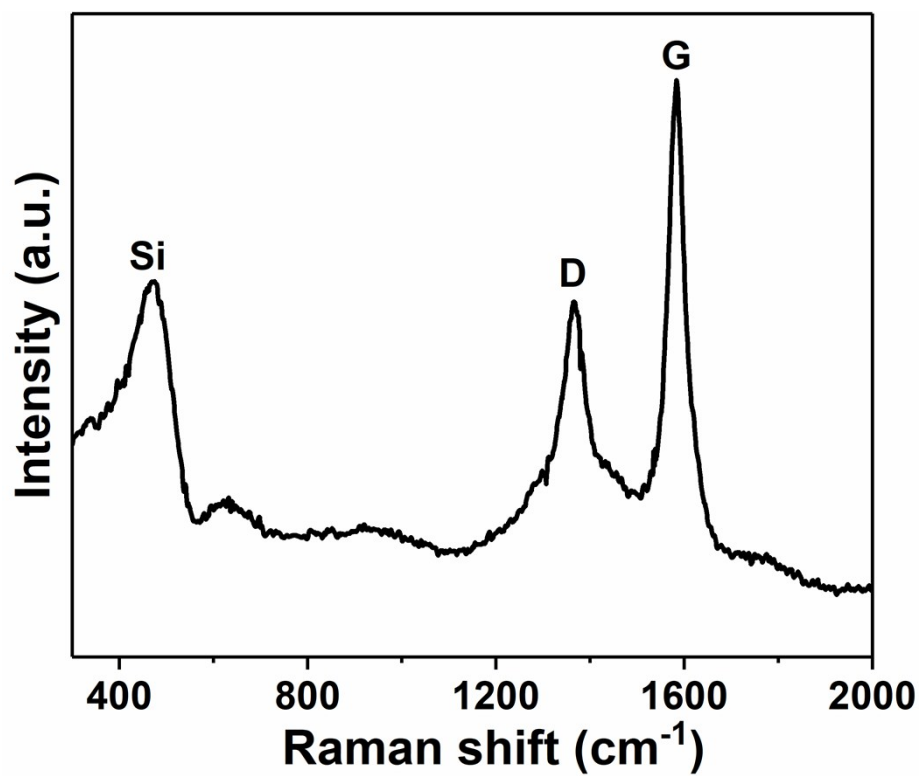

**Figure S5.** Raman spectrum of Si-MWCNTs membrane.

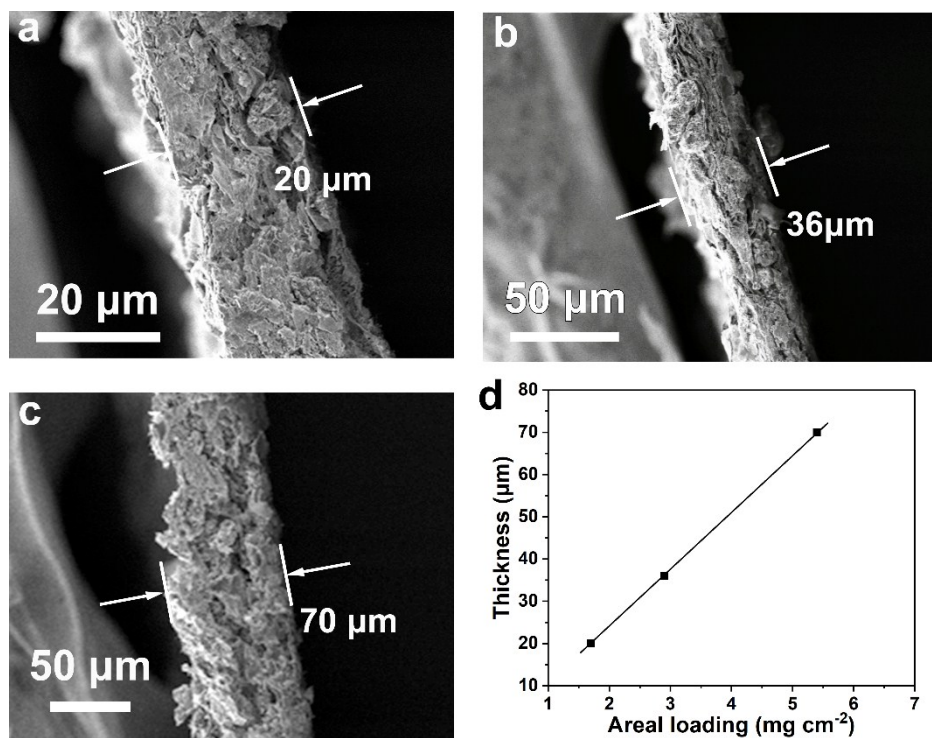

**Figure S6.** (a-c) Cross sectional SEM images of the Si-MWCNTs membranes with different thicknesses. (d) Relationship between the thickness and areal loading.

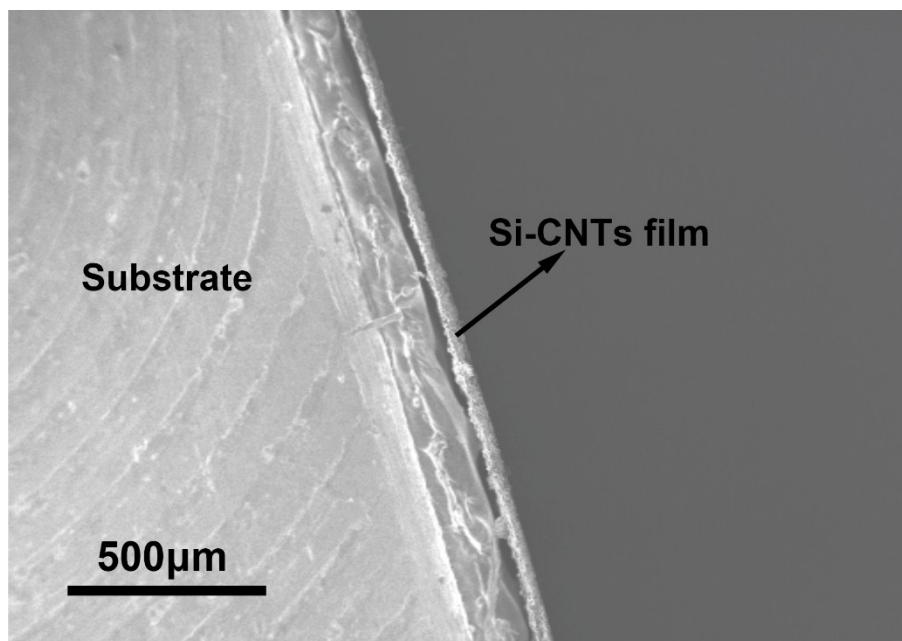

**Figure S7.** Low magnification cross sectional SEM image of Si-MWCTN film.



Table S1. Comparison of the mass loading and areal capacity based on Si-based film electrodes.

| <b>Samples</b>              | <b>Areal loading<br/>(mg cm<sup>-2</sup>)</b> | <b>Areal capacity<br/>(mAh cm<sup>-2</sup>)</b> | <b>Ref</b> |
|-----------------------------|-----------------------------------------------|-------------------------------------------------|------------|
| Si-MWCNTs                   | 2.9                                           | 4.5                                             | This work  |
| Carbon-Coated Si            | 0.5                                           | 1.4                                             | 1          |
| Carbon Graphdiyne Coated Si | 1.28                                          | 4.72                                            | 2          |
| Si/carbon nanofibers        | 0.76                                          | 0.66                                            | 3          |
| Si/MXene Paper              | 1.3                                           | 3.8                                             | 4          |
| Si/Carbon Fibers            | 2.0                                           | 2.4                                             | 5          |
| Si/Carbon Fibers            | 4.65                                          | 4.0                                             | 6          |
| Si/graphene membrane        | 0.4                                           | 0.69                                            | 7          |

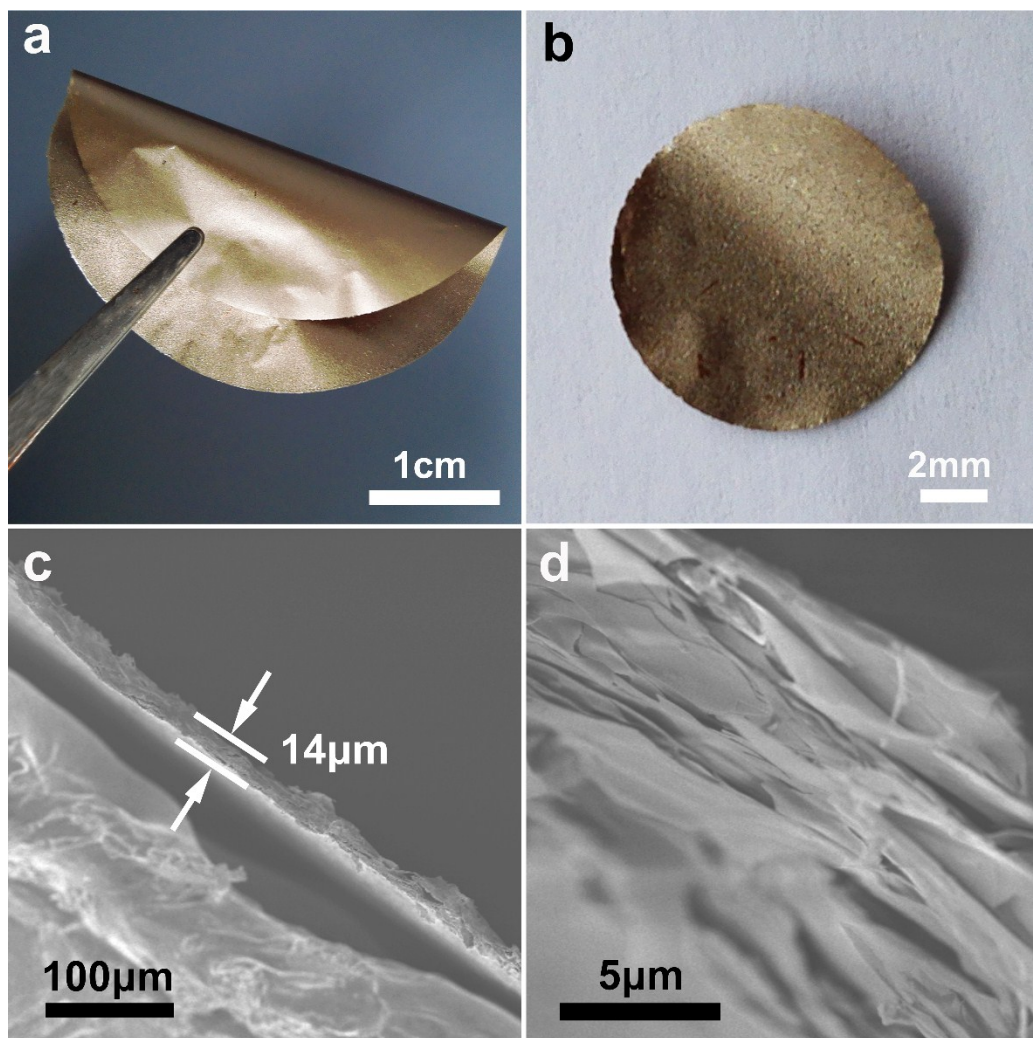

**Figure S8.** (a-b) Digital photo illustration of the freestanding Si film, (c-d) cross sectional SEM images.

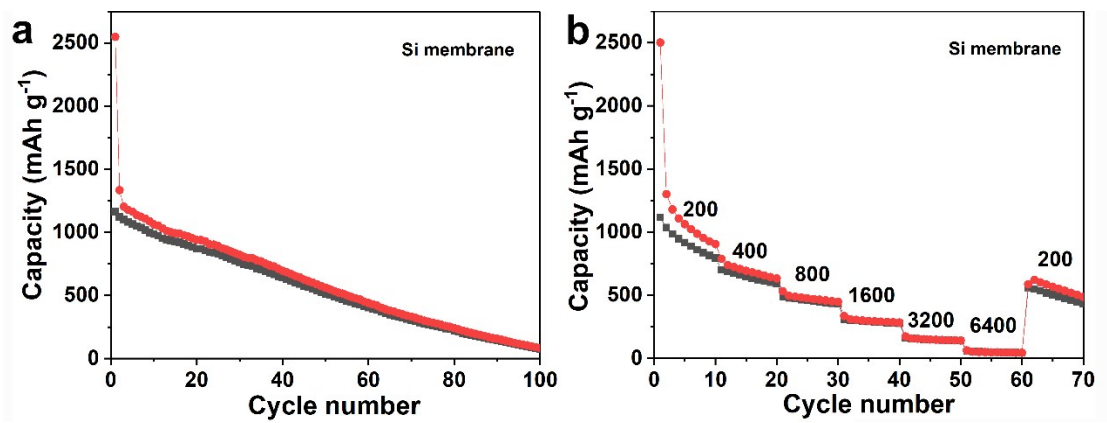

**Figure S9.** Electrochemical performance of Si membrane: (a) cycling performance at 200 mA g<sup>-1</sup>, (b) rate capability.

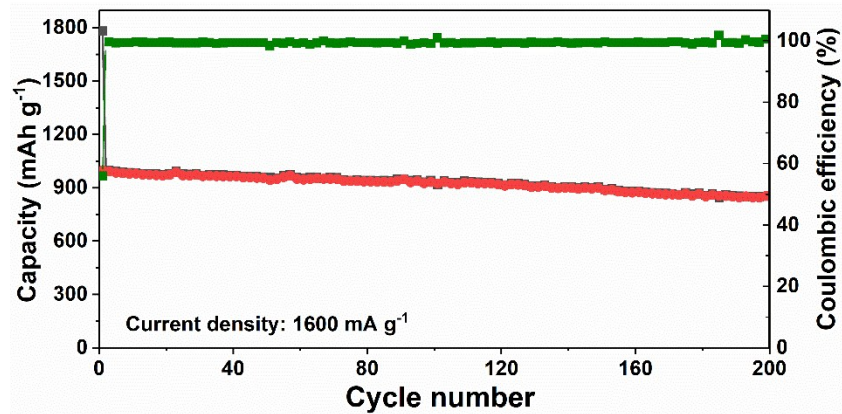

**Figure S10.** Long-term cycling of Si-MWCNTs film at  $1600 \text{ mA g}^{-1}$ , showing a capacity retention of 84.7% after 200 cycles.

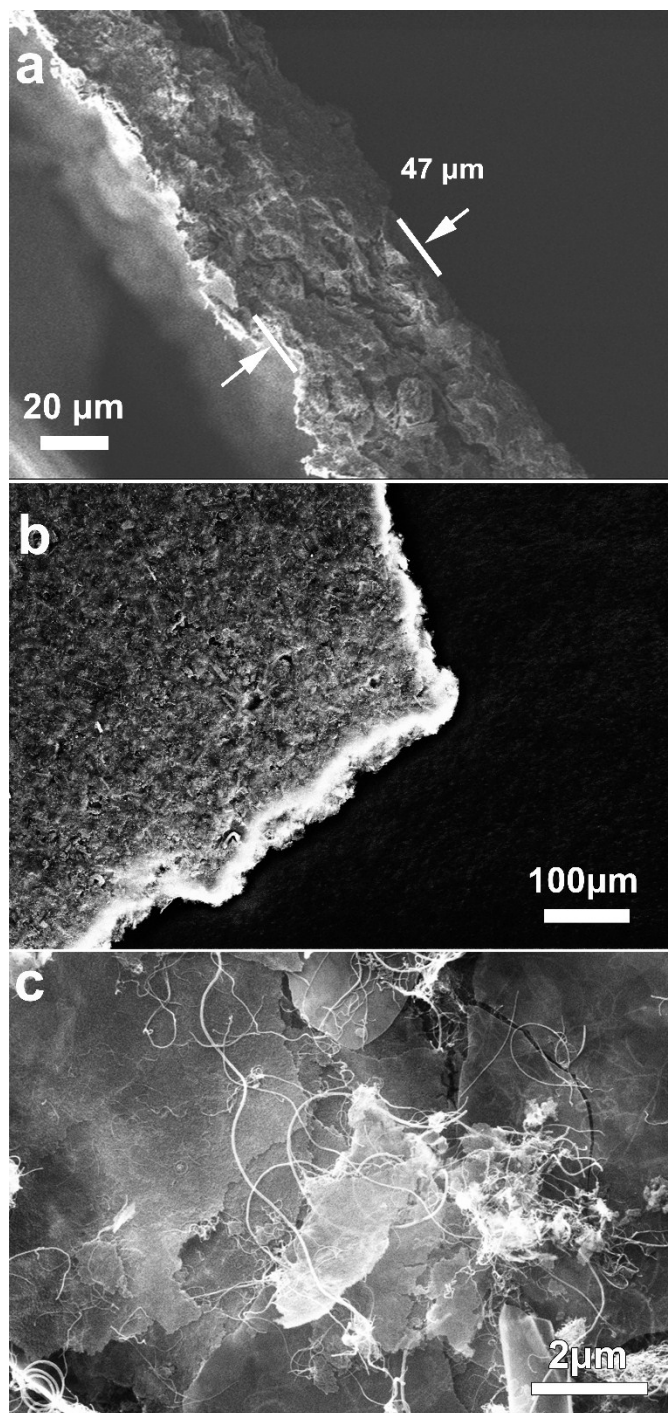

**Figure S11.** (a) Cross sectional SEM image of Si-MWCNT film after first lithiation. (b-c)

*Ex-situ* SEM images of Si-MWCNT film after 100 cycles.

**Table S2.** Comparison of the sample/electrode preparation and electrode mass loading of the Si nanosheets based electrodes.

| <b>Samples</b>                | <b>Sample preparation</b>        | <b>Phase structure</b> | <b>Electrode Preparation</b> | <b>Areal loading (mg cm<sup>-2</sup>)</b> | <b>Areal capacity (mAh cm<sup>-2</sup>)</b> | <b>Ref</b> |
|-------------------------------|----------------------------------|------------------------|------------------------------|-------------------------------------------|---------------------------------------------|------------|
| Porous Si nanoflakes          | PVD                              | Amorphous              | Freestanding                 | 2.9                                       | 4.5                                         | This work  |
| Si nanosheets                 | CVD                              | Crystalline            | Slurry coating               | 1.5                                       | 1.9                                         | 8          |
| 2D silicon                    | physical vacuum distillation     | Crystalline            | Slurry coating               | 2                                         | 3.0                                         | 9          |
| Few-Layer Silicene Nanosheets | liquid oxidation and exfoliation | Crystalline            | Slurry coating               | 1.1                                       | 0.8                                         | 10         |
| Silicon Nanosheets            | CVD                              | Crystalline            | Slurry coating               | --                                        | --                                          | 11         |
| Silicon Nanosheets            | Topochemical reaction            | Amorphous              | Slurry coating               | 2                                         | 2.0                                         | 12         |
| 2D silicon                    | CVD                              | Crystalline            | Slurry coating               | 1.1                                       | 2.2                                         | 13         |

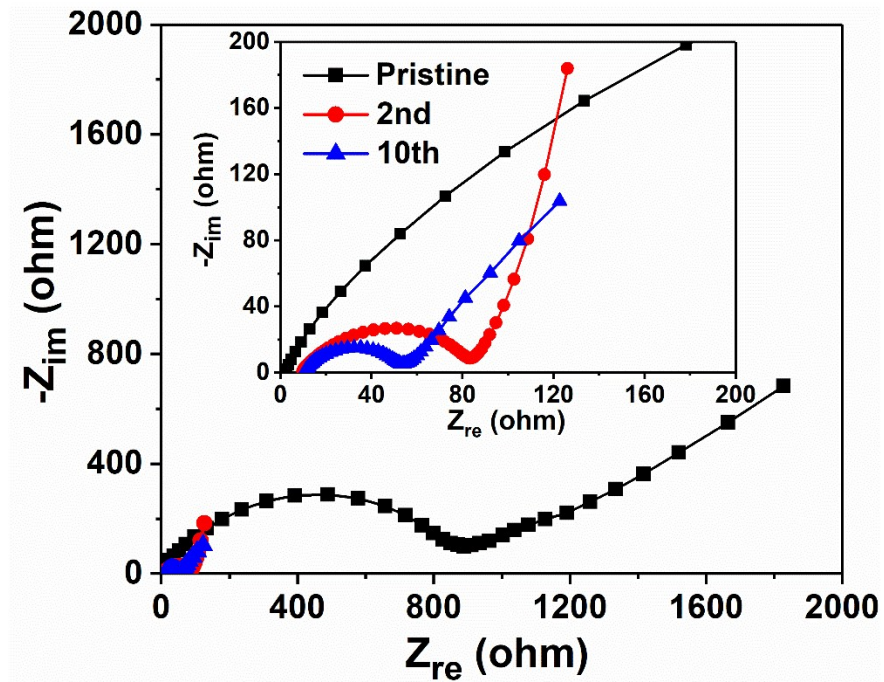

**Figure S12.** Nyquist plots of Si-MWCNTs at 200 mA g<sup>-1</sup> at different cycles.

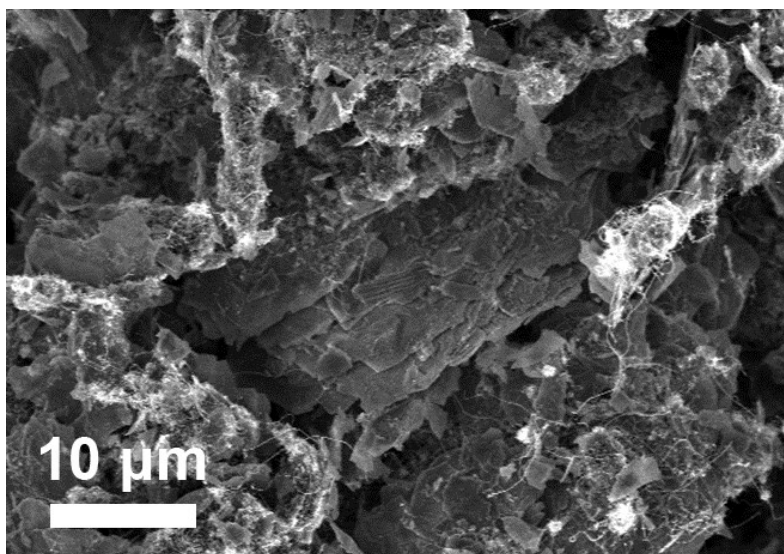

**Figure S13.** Ex situ SEM image of Si-MWCNTs at a high loading of  $5.4 \text{ mg cm}^{-2}$  after 100 cycles.



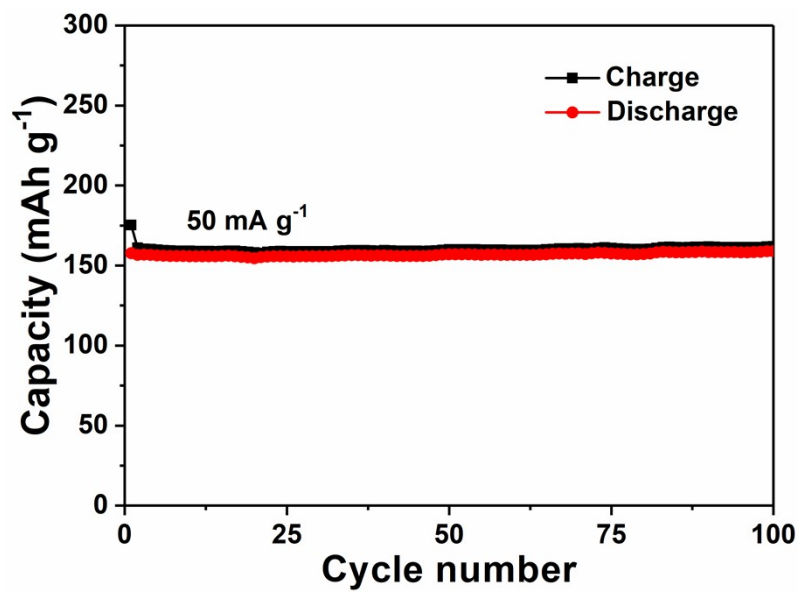

**Figure S14.** Cycling performance of NCM at 50 mA g<sup>-1</sup>, showing a highly stable cycling.

## References:

- 1 C. Shen, X. Fang, M. Ge, A. Zhang, Y. Liu, Y. Ma, M. Mecklenburg, X. Nie and C. Zhou, *ACS Nano*, 2018, **12**, 6280-6291.
- 2 H. Shang, Z. Zuo, L. Yu, F. Wang, F. He and Y. Li, *Adv. Mater.*, 2018, **30**, 1801459.
- 3 E. Qu, T. Chen, Q. Xiao, G. Lei and Z. Li, *J. Power Sources*, 2018, **403**, 103-108.
- 4 Y. Tian, Y. An and J. Feng, *ACS Appl. Mater. Interfaces*, 2019, **11**, 10004-10011.
- 5 X. Chen, P. Hu, J. Xiang, R. Zhang and Y. Huang, *ACS Appl. Energy Mater.*, 2019, **2**, 5214-5218.
- 6 M. Wang, W. Song, J. Wang and L. Fan, *Carbon*, 2015, **82**, 337-345.
- 7 Z. Luo, Q. Xiao, G. Lei, Z. Li and C. Tang, *Carbon*, 2016, **98**, 373-380.
- 8 J. Ryu, D. Hong, S. Choi and S. Park, *ACS Nano*, 2016, **10**, 2843-2851.
- 9 Y. An, Y. Tian, C. Wei, H. Jiang, B. Xi, S. Xiong, J. Feng and Y. Qian, *ACS Nano*, 2019, **13**, 13690-13701.
- 10 J. Liu, Y. Yang, P. Lyu, P. Nachtigall and Y. Xu, *Adv. Mater.*, 2018, **30**, 1800838.
- 11 Z. Lu, J. Zhu, D. Sim, W. Zhou, W. Shi, H. H. Hng and Q. Yan, *Chem. Mater.*, 2011, **23**, 5293-5295.
- 12 K. Xu, L. Ben, H. Li and X. Huang, *Nano Res.*, 2015, **8**, 2654-2662.
- 13 J. Ryu, T. Chen, T. Bok, G. Song, J. Ma, C. Hwang, L. Luo, H.-K. Song, J. Cho and C. Wang, *Nat. Commun.*, 2018, **9**, 2924.
